# Supplementary material for: Novel salenCo(iii) photoinitiators and their application for cycloaddition of carbon dioxide
Source: Royal Society of Chemistry journal article supplement (doi:10.1039/d3ra02370b), 2023-01-01
Supplement: d3ra02370b1.pdf [file d3ra02370b1.pdf]

Supporting Information

**NOVEL SALENCO(III) PHOTOINITIATORS AND THEIR  
APPLICATION FOR CYCLOADDITION OF CARBON  
DIOXIDE**

*Daoqing Chen, LongChao Du, Jie Yang*

Address correspondence to Longchao Du, School of Chemistry and Chemical Engineering, the Key Laboratory of Environment-friendly Polymer Materials of Anhui Province & Key Laboratory of Structure and Functional Regulation of Hybrid Materials (Anhui University), Ministry of Education, Hefei, 230601, PRC.

E-mail address: [dulongchao@sina.com](mailto:dulongchao@sina.com)

**General information:**

All reactions are protected by the passage of N<sub>2</sub>, except for specific reactions that require the passage of O<sub>2</sub>. All reagents purchased were analytically pure (AR) with a purity of 99.0% or higher. All reagents used for the reaction and polymerization were distilled with calcium hydride and placed inside the dry (1,2-dichloroethane, propylene oxide, CH<sub>3</sub>CN). The <sup>1</sup>H-NMR was recorded on a nuclear magnetic resonance (NMR) spectrometer (avanceii, 400MHz). Samples were dissolved in CDCl<sub>3</sub> or CD<sub>3</sub>SOCD<sub>3</sub>. The ultraviolet visible absorption spectrum was recorded on Shimadzu UV-3600 spectrophotometer.

**Scheme S1** Synthesis route of Compound 1, [C1] and [C2]

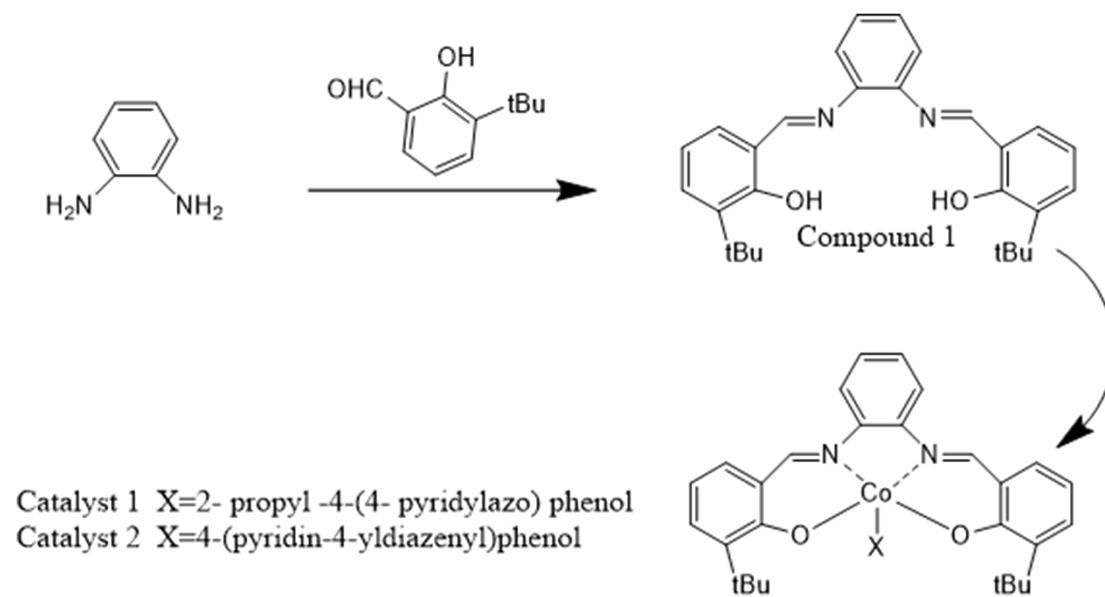

**Scheme S2** Synthesis route of Compound 2, [C3] and [C4]

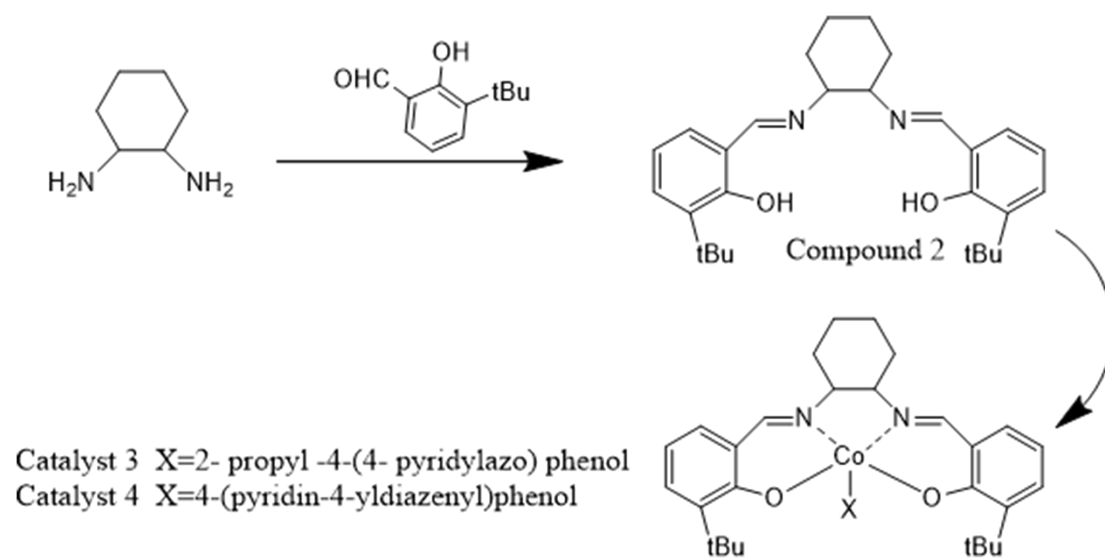

**Fig S1** (a) is the  $^1\text{H-NMR}$  of compound 1; (b) is the ESI-MS mass spectrum of compound 1

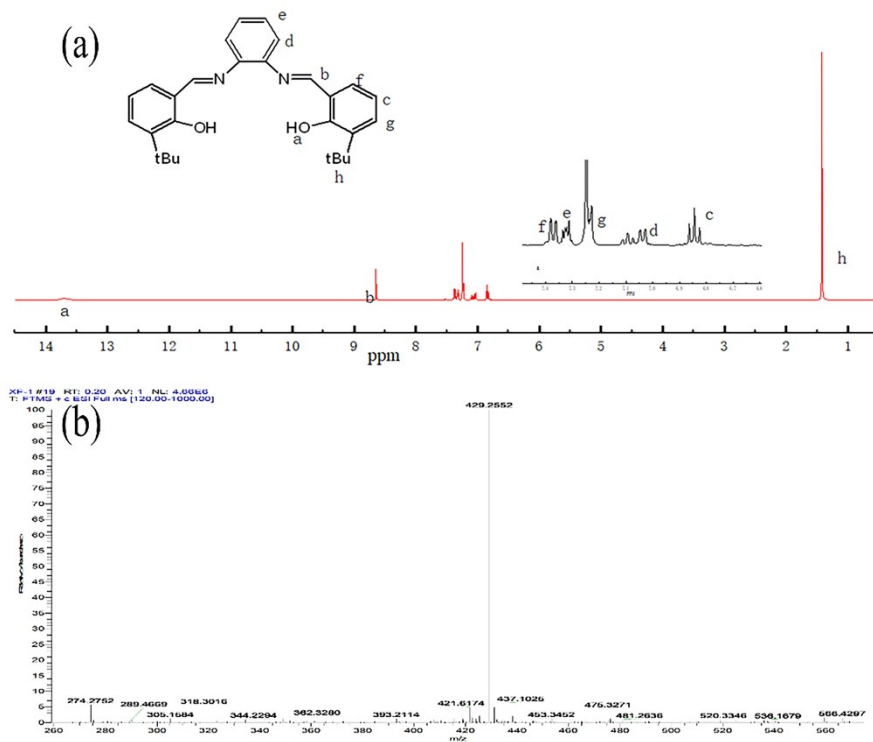

**Fig S2.** Infrared spectrum of compound 1

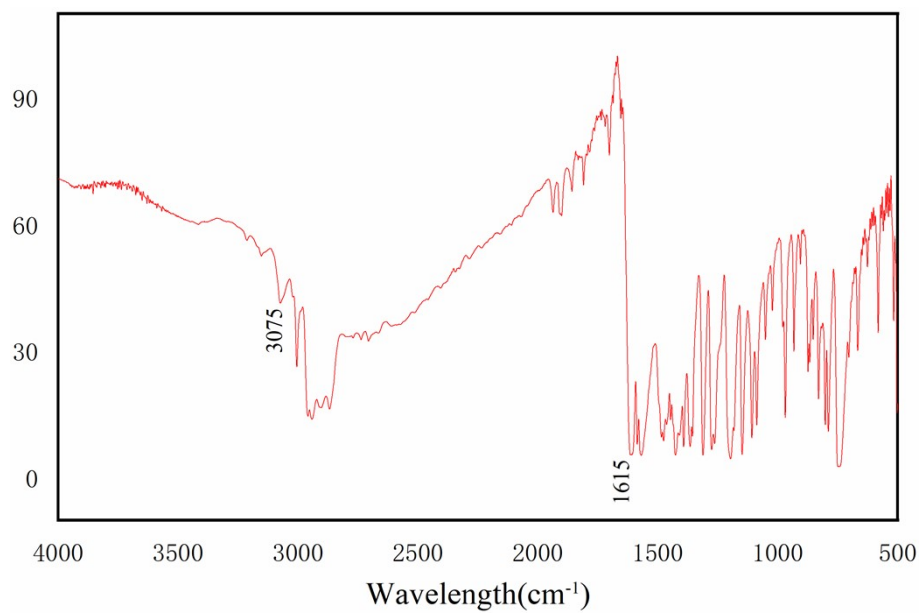

**Fig S3** (a) is the  $^1\text{H-NMR}$  of compound 2; (b) is the ESI-MS mass spectrum of compound 2

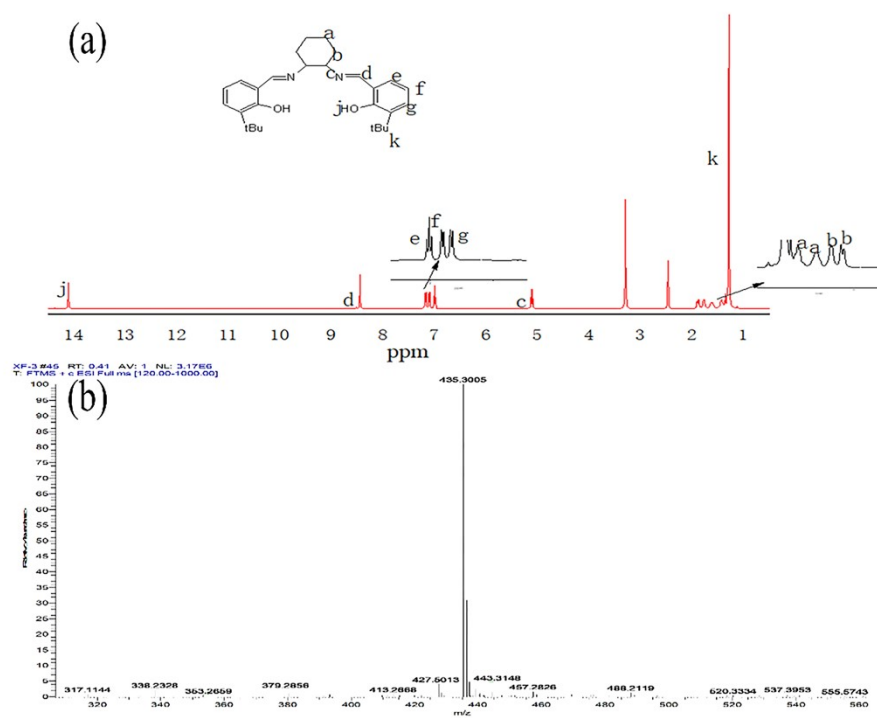

**Fig S4.** Infrared spectrum of compound 2

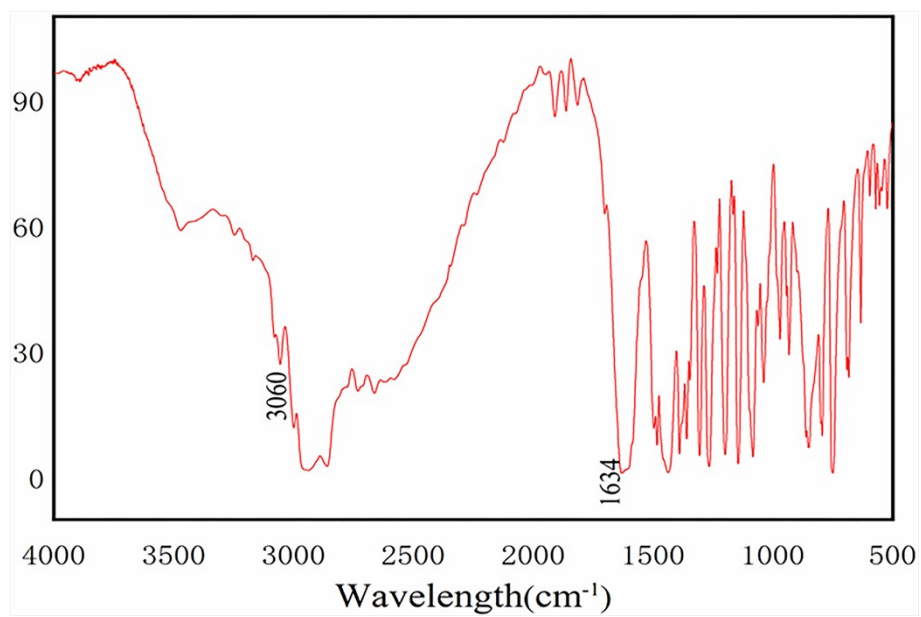

**Fig S5** (a) is the  $^1\text{H-NMR}$  of [C1]; (b) is the ESI-MS mass spectrum of [C1]

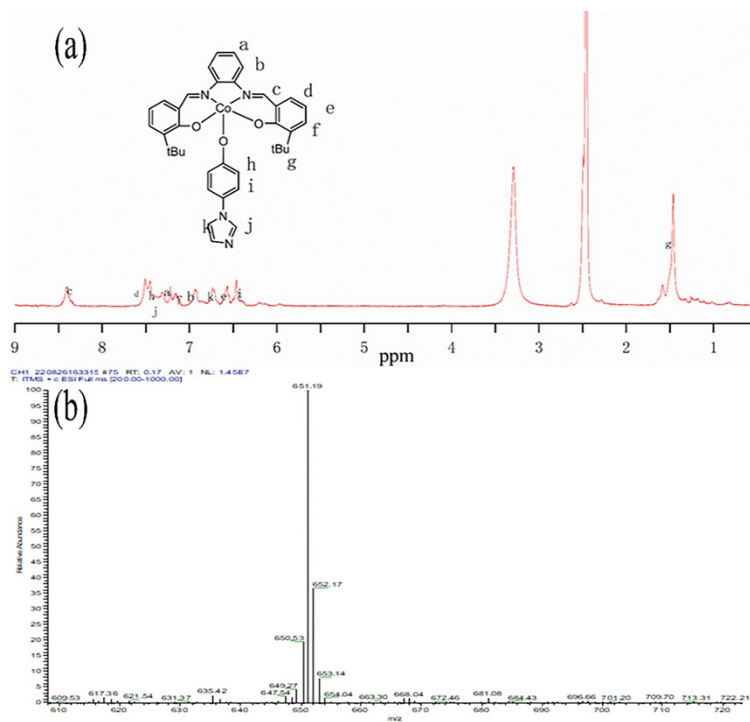

**Fig S6** (a) is the  $^1\text{H-NMR}$  of [C2]; (b) is the ESI-MS mass spectrum of [C2]

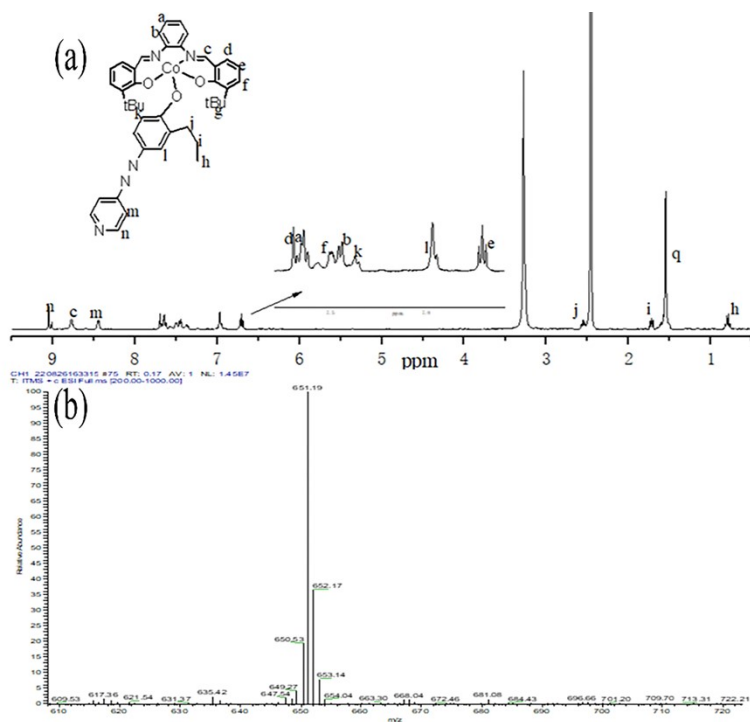

**Fig S7.** Infrared spectrum of [C1] and [C2]

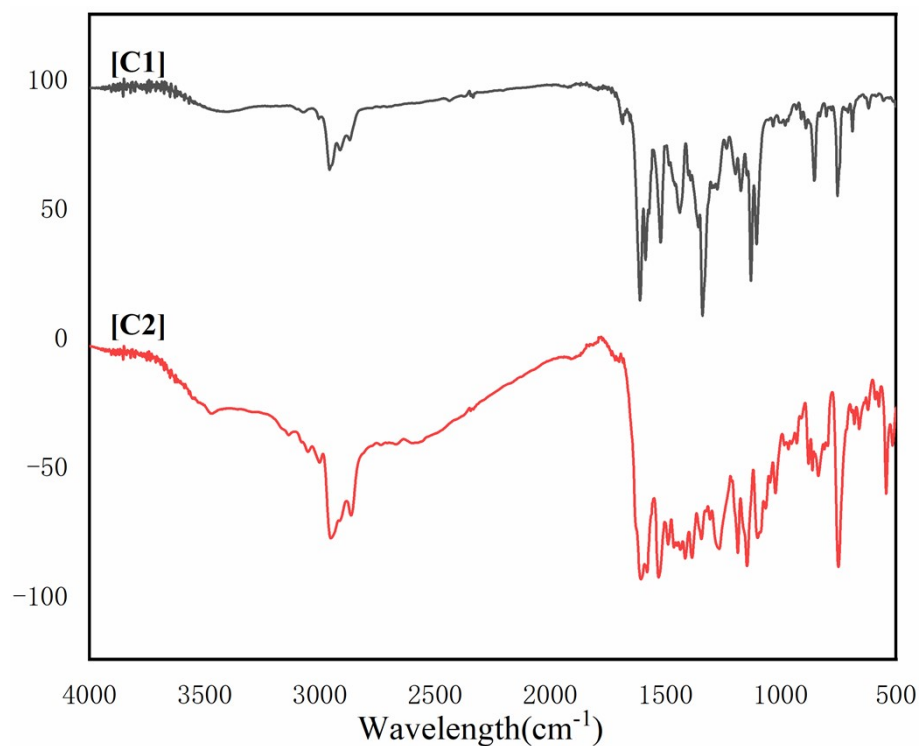

**Fig S8** (a) is the <sup>1</sup>H-NMR of [C3]; (b) is the ESI-MS mass spectrum of [C3]

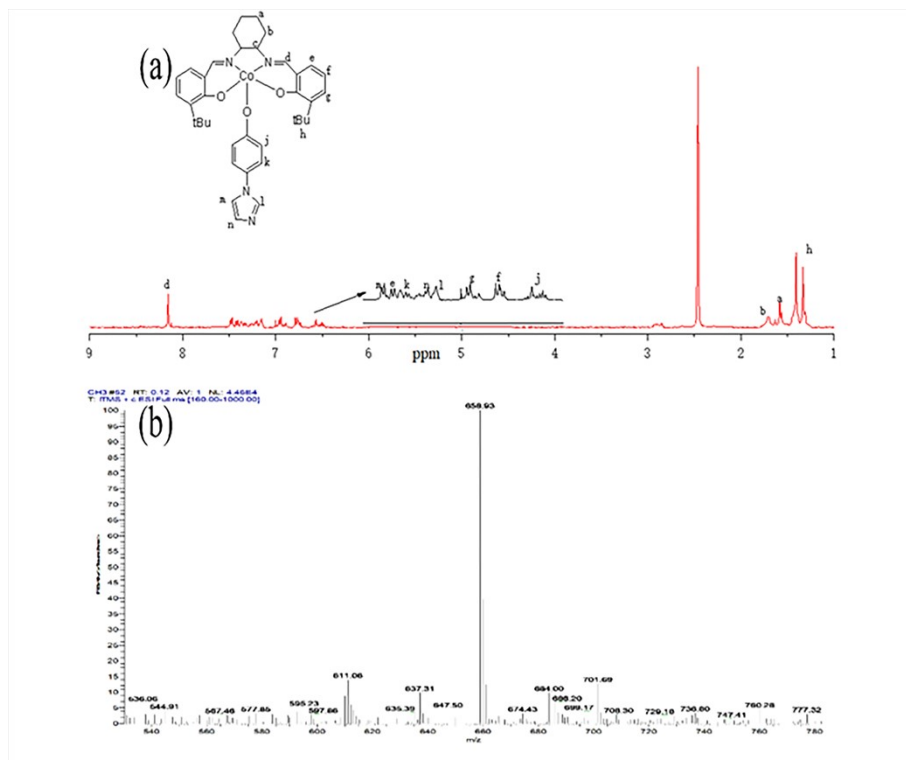

**Fig S9** (a) is the  $^1\text{H-NMR}$  of [C4]; (b) is the ESI-MS mass spectrum of [C4]

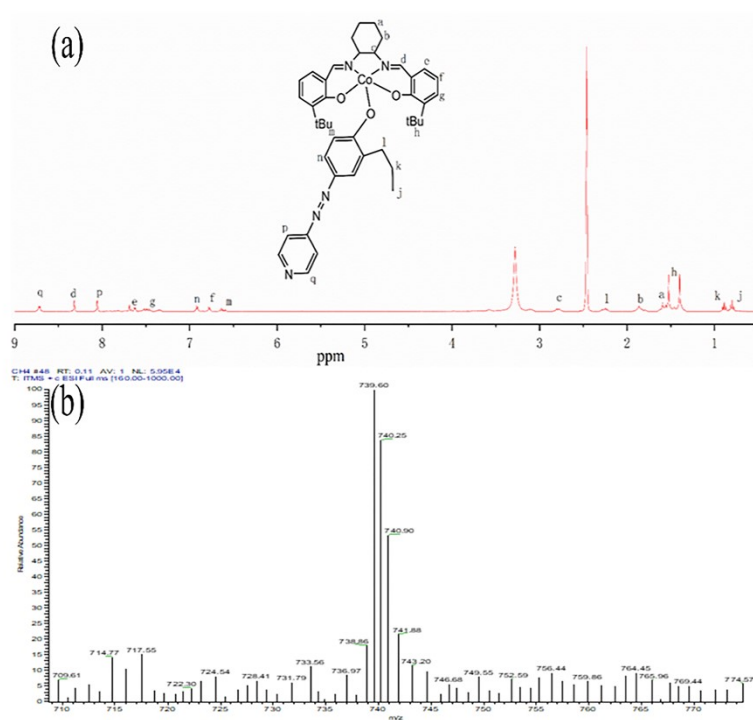

**Fig S10.** Infrared spectrum of [C3] and [C4]

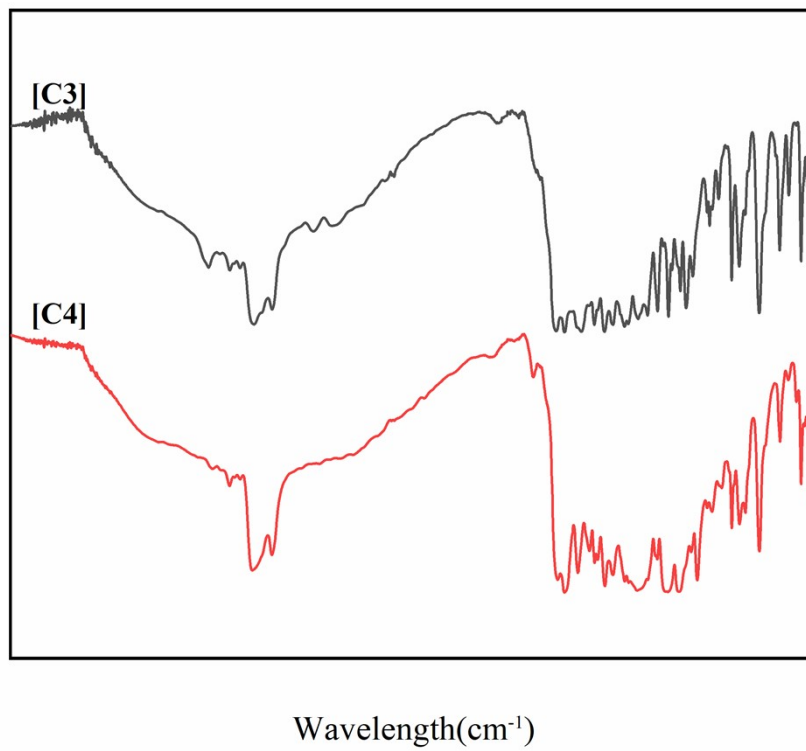



**Fig S11.**  $^1\text{H}$  NMR of the products catalyzed by [C1], [C2], [C3] and [C4] with shading experiments

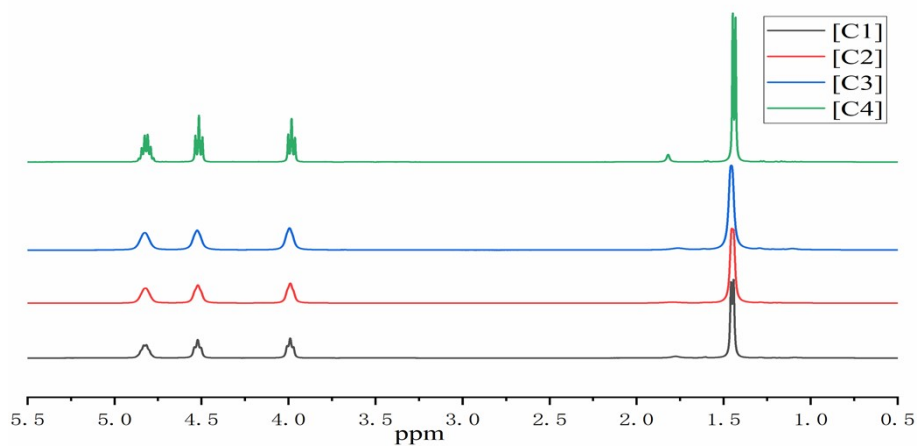

**Fig S12.**  $^1\text{H}$  NMR of the products catalyzed by [C1], [C2], [C3] and [C4] with light experiments.

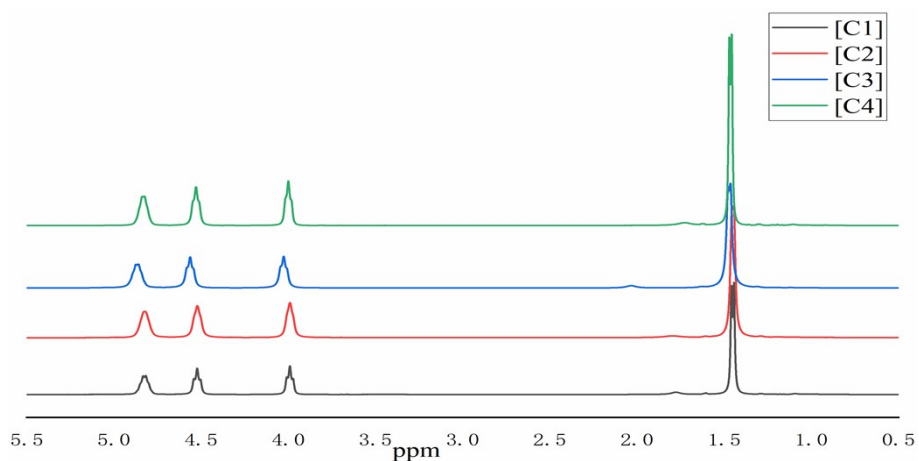

**Fig S13.** The  $^1\text{H}$  NMR of the products for [C4] under different light sources: 0 W, 100 W, 200 W at 60°C, 6 h and 2 MPa  $\text{CO}_2$

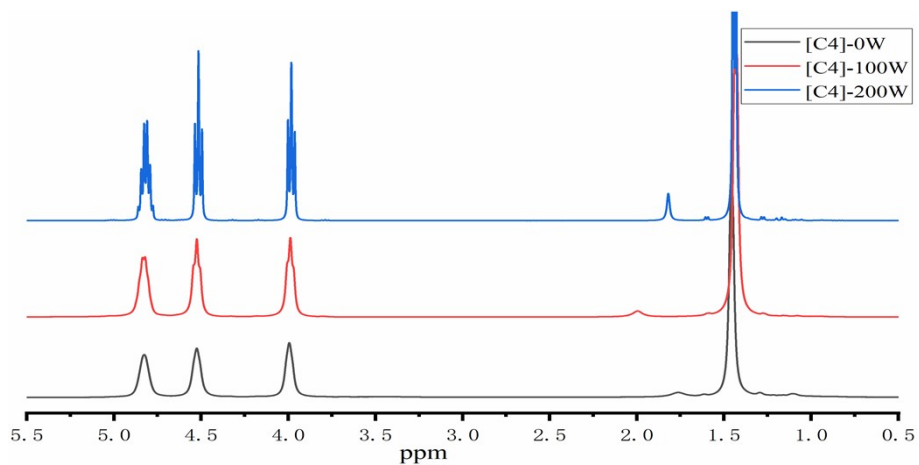

**Fig S14.** The light transmittance of the filter can reach about 90% in the range of 395 nm~421nm.

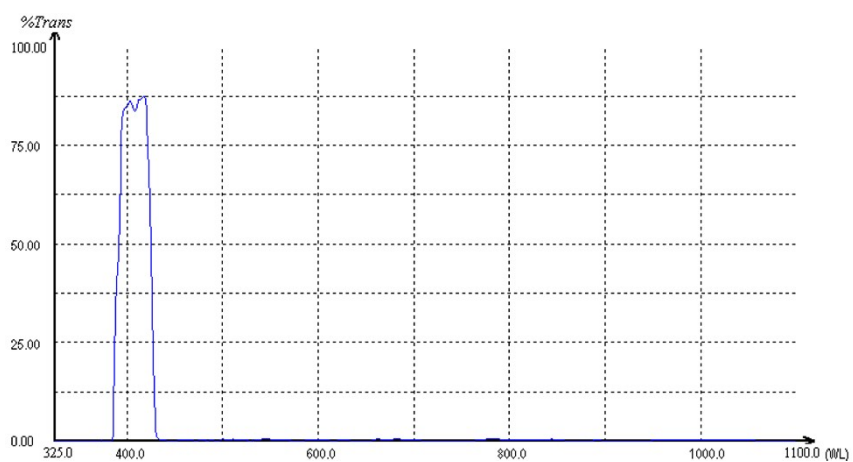

**Fig S15.** The light transmittance of the filter can reach about 90% in the range of 433 nm~459 nm.

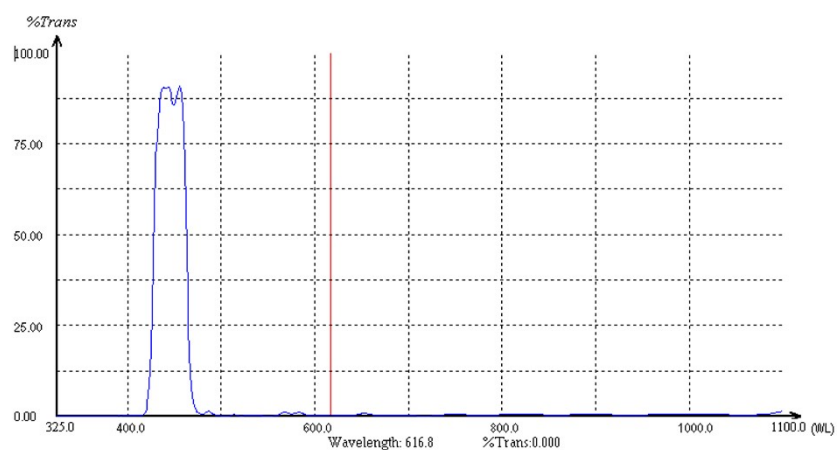

**Fig S16.** The light transmittance of the filter can reach about 90% in the range of 472 nm~505 nm.

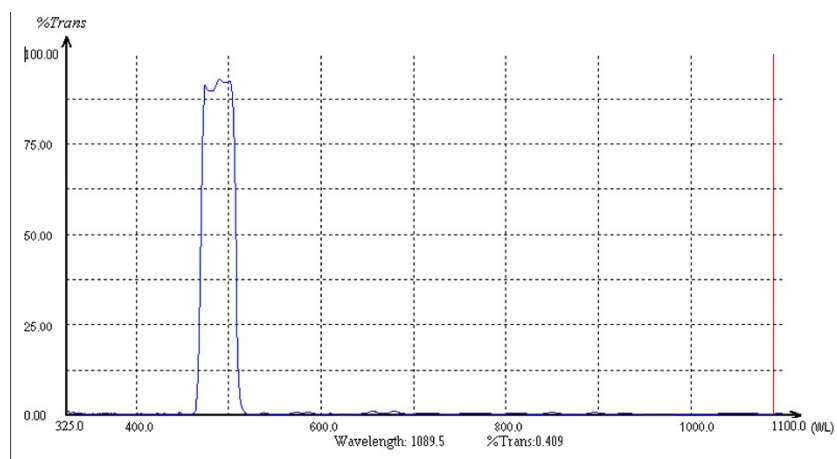

**Fig S17.** The light transmittance of the filter can reach about 90% in the range of 520nm~554nm.

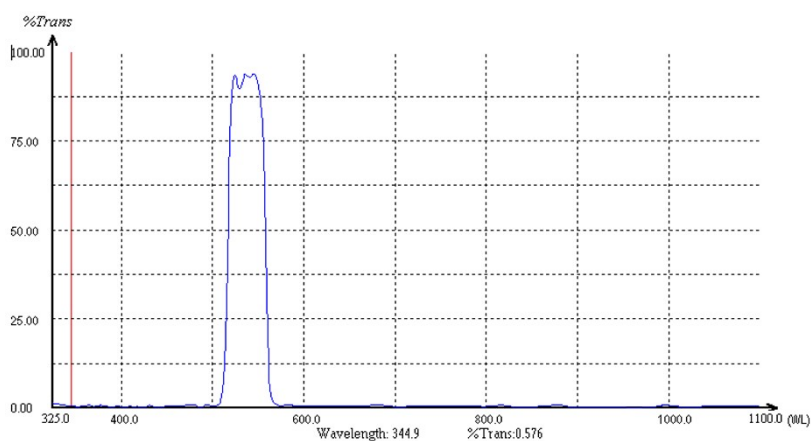

**Fig S18.** The light transmittance of the filter can reach about 90% in the range of 536nm~575nm.

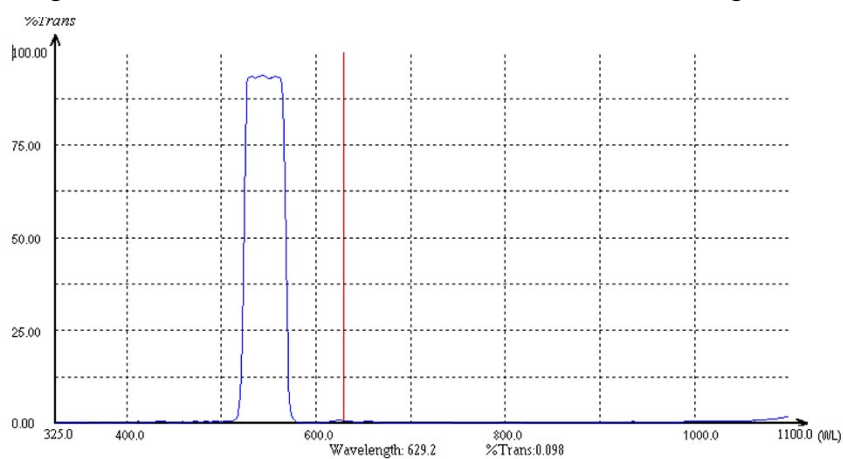

**Table S1** Elemental analysis

| Entry | Sample     | C%    | H%   | N%   |
|-------|------------|-------|------|------|
| 1     | Compound 1 | 78.47 | 7.53 | 6.54 |
| 2     | Compound 2 | 77.38 | 8.81 | 6.45 |
| 3     | [C1]       | 68.95 | 5.80 | 8.75 |
| 4     | [C2]       | 69.31 | 6.11 | 9.65 |
| 5     | [C3]       | 68.30 | 6.65 | 8.61 |
| 6     | [C4]       | 68.93 | 6.89 | 9.57 |

**Table S2** The result of catalytic copolymerization of CO<sub>2</sub> with PO<sup>a</sup>

| Cat  | T (°C) | P (MPa) | t (h) | TOF <sup>-1</sup> | TON   |
|------|--------|---------|-------|-------------------|-------|
| [C4] | 50     | 2       | 6     | 27.52             | 165.1 |
| [C4] | 60     | 2       | 6     | 31.55             | 189.3 |
| [C4] | 70     | 2       | 6     | 33.72             | 202.3 |
| [C4] | 80     | 2       | 6     | 35.43             | 212.6 |
| [C4] | 60     | 1       | 6     | 24.17             | 145   |
| [C4] | 60     | 2       | 6     | 31.55             | 189.3 |
| [C4] | 60     | 3       | 6     | 36.05             | 216.3 |
| [C4] | 60     | 4       | 6     | 37.75             | 226.5 |
| [C4] | 60     | 2       | 0.5   | 172.6             | 86.3  |
| [C4] | 60     | 2       | 2     | 62.7              | 125.4 |
| [C4] | 60     | 2       | 4     | 41.28             | 165.1 |
| [C4] | 60     | 2       | 6     | 31.55             | 189.3 |
| [C4] | 60     | 2       | 8     | 25.71             | 205.7 |
| [C4] | 60     | 2       | 12    | 19.175            | 230.1 |
| [C4] | 60     | 2       | 16    | 14.28             | 228.5 |
| [C4] | 60     | 2       | 20    | 10.77             | 215.3 |

<sup>a</sup>. Reaction conditions: catalyst  $3 \times 10^{-5}$  mol; 100 W light source lighting.

**Table S3** Activity of past heterogeneous catalysts in carbon dioxide cycloaddition reactions

| Cat  | Epoxide | T (°C) | P (MPa) | TON   | CPC (%) | Ref.             |
|------|---------|--------|---------|-------|---------|------------------|
| 6    | PO      | 60     | 2       | 126   | 10      | [ <sup>1</sup> ] |
| 6    | CHO     | 60     | 2       | 216   | 13      | [ <sup>1</sup> ] |
| [C4] | PO      | 60     | 2       | 128.4 | 44.3    | This work        |
| [C4] | CHO     | 60     | 2       | 204.5 | 46.7    | This work        |

## References

<sup>1</sup> L. Du, C. Wang, W. Zhu and J. Zhang, *J Chin Chem Soc*, 2020, **67**, 72–79.
